# Supplementary material for: Impact of water vapor diffusion and latent heat on the effective thermal conductivity of snow
Source: Copernicus journal article supplement (doi:10.5194/tc-15-2739-2021), 2021-06-18
Supplement: Supplementary file 1 [file Table_Keff_Deff_FastKins.xls]

## Sheet: Notes
Data set of snow effective thermal conductivity and effective water vapor diffusion coefficient in snow under fast kinetics.
Published as a Supplementary Materiel of Fourteau et al. 2020, The Cryosphere Discussion
Please cite if using

## Sheet: Temperature 273 K
Snow Type	Density(kg/m3)	SSA(m2/kg)	Kxy(W/K/m)	Kz(W/K/m)	Dxy(m2/s)	Dz(m2/s)	Sample Size	Comments
PP	93.0	53.0	0.0957741397501631	0.09244910482348029	1.9519777665859152e-05	1.9551527554050137e-05	7.5x7.5x7.5 mm³	Snow sample provided by Peinke et al., 2020, doi :10.3389/feart.2020.00063
DF	125.0	40.0	0.12407731288446532	0.10468699516877832	1.9249518073921306e-05	1.9434671142396006e-05	6x6x6 mm³	Previously unpublished snow sample. Obtained during a gradient box snow metamorphism experiment.
PP	137.0	41.0	0.1292178551705564	0.1253474242339373	1.9200432381162205e-05	1.9237390113095323e-05	7.5x7.5x7.5 mm³	Snow sample provided by Peinke et al., 2020, doi :10.3389/feart.2020.00063
DH	145.0	29.0	0.11924853618546385	0.10501717694872348	1.9295626798693566e-05	1.9431518323003994e-05	6x6x6 mm³	Previously unpublished snow sample. Obtained during a gradient box snow metamorphism experiment.
DH	156.0	26.0	0.12384240116532497	0.11762071206308326	1.925176118443952e-05	1.931117046515717e-05	6x6x6 mm³	Previously unpublished snow sample. Obtained during a gradient box snow metamorphism experiment.
DH	157.0	20.0	0.13377249063742436	0.1338529857046909	1.9156941359259448e-05	1.915617273293161e-05	6x6x6 mm³	Previously unpublished snow sample. Obtained during a gradient box snow metamorphism experiment.
DH	161.0	21.0	0.12019130673208721	0.12417762426712858	1.928662452951292e-05	1.924856022678464e-05	6x6x6 mm³	Previously unpublished snow sample. Obtained during a gradient box snow metamorphism experiment.
DH	177.0	18.0	0.1390285541988891	0.15096660872008674	1.9106752584079355e-05	1.8992759226227887e-05	6x6x6 mm³	Previously unpublished snow sample. Obtained during a gradient box snow metamorphism experiment.
DH	178.0	18.0	0.145986338995647	0.16202326324730632	1.9040314518246937e-05	1.888718212621353e-05	6x6x6 mm³	Previously unpublished snow sample. Obtained during a gradient box snow metamorphism experiment.
DH	187.0	20.0	0.14832976903973583	0.1600229398062032	1.9017937718145935e-05	1.890628269117036e-05	6x6x6 mm³	Previously unpublished snow sample. Obtained during a gradient box snow metamorphism experiment.
DH	193.0	19.0	0.1551006125840077	0.17691843998412593	1.895328470540186e-05	1.8744951982348277e-05	6x6x6 mm³	Previously unpublished snow sample. Obtained during a gradient box snow metamorphism experiment.
DH	197.0	19.0	0.17445902368866895	0.20166261613497802	1.876843630480433e-05	1.8508676321042213e-05	6x6x6 mm³	Previously unpublished snow sample. Obtained during a gradient box snow metamorphism experiment.
DH	200.0	19.0	0.1734008773879195	0.19770739533879514	1.8778540266861663e-05	1.8546443689150665e-05	6x6x6 mm³	Previously unpublished snow sample. Obtained during a gradient box snow metamorphism experiment.
FC	214.0	20.0	0.20982791895277514	0.15434110635534856	1.8430707981693285e-05	1.896053703157948e-05	9x9x9 mm³	Snow sample provided by Hagenmuller et al., 2016, doi :10.5194/tc-10-1039-2016
DF	217.0	33.0	0.20733367546286707	0.17118791129638783	1.8454524859913177e-05	1.879967130082848e-05	9x9x9 mm³	Snow sample provided by Hagenmuller et al., 2019, doi :10.5194/tc-13-2345-2019
FC	230.0	20.0	0.22210300062431645	0.16468252151016982	1.8313496439799638e-05	1.88617895651191e-05	9x9x9 mm³	Snow sample provided by Hagenmuller et al., 2016, doi :10.5194/tc-10-1039-2016
FC	236.0	24.0	0.2036324948727094	0.22755929429881816	1.8489866464589014e-05	1.8261395719680145e-05	9x9x9 mm³	Snow sample provided by Hagenmuller et al., 2019, doi :10.5194/tc-13-2345-2019
FC	265.0	19.0	0.24689212517906234	0.2390657567431001	1.8076791577949985e-05	1.815152352160244e-05	9x9x9 mm³	Snow sample provided by Hagenmuller et al., 2016, doi :10.5194/tc-10-1039-2016
RG	266.0	19.0	0.2390106129141561	0.23668473063025633	1.8152050075591194e-05	1.8174259316723252e-05	9x9x9 mm³	Snow sample provided by Hagenmuller et al., 2016, doi :10.5194/tc-10-1039-2016
FC	270.0	19.0	0.24809791616756133	0.2473128503229194	1.8065277795415154e-05	1.8072774183675594e-05	9x9x9 mm³	Snow sample provided by Hagenmuller et al., 2016, doi :10.5194/tc-10-1039-2016
RG	275.0	19.0	0.25287469697285014	0.25675418208120004	1.8019665565822095e-05	1.7982621377973034e-05	9x9x9 mm³	Snow sample provided by Hagenmuller et al., 2016, doi :10.5194/tc-10-1039-2016
FC	282.0	18.0	0.26314009433064545	0.2817434551877376	1.792164397340795e-05	1.7744005349990963e-05	9x9x9 mm³	Snow sample provided by Hagenmuller et al., 2016, doi :10.5194/tc-10-1039-2016
FC	287.0	18.0	0.2672519596887504	0.29156423911367346	1.788238084737923e-05	1.7650229254860615e-05	9x9x9 mm³	Snow sample provided by Hagenmuller et al., 2016, doi :10.5194/tc-10-1039-2016
RG	293.0	23.0	0.25293135110010523	0.23554174882602547	1.8019124590390086e-05	1.818517335079774e-05	9x9x9 mm³	Snow sample provided by Peinke et al., 2020, doi :10.3389/feart.2020.00063
RG	312.0	23.0	0.2737266363108173	0.26582486630450197	1.7820555855053957e-05	1.7896007788565436e-05	9x9x9 mm³	Snow sample provided by Peinke et al., 2020, doi :10.3389/feart.2020.00063
RG	316.0	34.0	0.28063456931242575	0.2758591589168902	1.775459381096477e-05	1.7800192954873798e-05	6x6x6 mm³	Previously unpublished snow sample. Sampled at Col du Lautaret, France.
FC	318.0	16.0	0.2934191664850041	0.32737452887402374	1.763251703891679e-05	1.7308286171239416e-05	9x9x9 mm³	Snow sample provided by Hagenmuller et al., 2016, doi :10.5194/tc-10-1039-2016
RG	324.0	21.0	0.2766407448214132	0.27490605643739036	1.7792729795650678e-05	1.7809293880977108e-05	9x9x9 mm³	Snow sample provided by Peinke et al., 2020, doi :10.3389/feart.2020.00063
FC	329.0	15.0	0.31268135239060746	0.3401473585700141	1.7448587467558235e-05	1.7186321763745254e-05	9x9x9 mm³	Snow sample provided by Hagenmuller et al., 2016, doi :10.5194/tc-10-1039-2016
DH	353.0	17.0	0.3156489676823294	0.29550920101969785	1.7420250485907328e-05	1.761255984620903e-05	9x9x9 mm³	Snow sample provided by Peinke et al., 2020, doi :10.3389/feart.2020.00063
DH	364.0	17.0	0.32122182867342314	0.30347995280394024	1.7367036694993054e-05	1.753644922375602e-05	9x9x9 mm³	Snow sample provided by Peinke et al., 2020, doi :10.3389/feart.2020.00063
DH	372.0	16.0	0.34651543991338674	0.31980459897385577	1.712551462183504e-05	1.7380569450436047e-05	9x9x9 mm³	Snow sample provided by Peinke et al., 2020, doi :10.3389/feart.2020.00063
MF	380.0	5.0	0.3918723675215394	0.4964982590849858	1.6692413192226177e-05	1.569336793938843e-05	9x9x9 mm³	Previously unpublished snow sample. Sampled at Col du Lautaret, France.
MF	445.0	5.0	0.49514182762742237	0.6337001670598815	1.5706320148332393e-05	1.4383262832570967e-05	9x9x9 mm³	Previously unpublished snow sample. Provided by Marie Dumont and colleagues (see acknowledgment section)

## Sheet: Temperature 268 K
Snow Type	Density(kg/m3)	SSA(m2/kg)	Kxy(W/K/m)	Kz(W/K/m)	Dxy(m2/s)	Dz(m2/s)	Sample Size	Comments
PP	93.0	53.0	0.08672002704806116	0.08344496177041984	1.95588811439049e-05	1.9588908432079025e-05	7.5x7.5x7.5 mm³	Snow sample provided by Peinke et al., 2020, doi :10.3389/feart.2020.00063
DF	125.0	40.0	0.11404621932599095	0.09495743412627036	1.9308342183404582e-05	1.9483356848913408e-05	6x6x6 mm³	Previously unpublished snow sample. Obtained during a gradient box snow metamorphism experiment.
PP	137.0	41.0	0.11930917563032005	0.11558087719125369	1.9260089006078077e-05	1.929427174203551e-05	7.5x7.5x7.5 mm³	Snow sample provided by Peinke et al., 2020, doi :10.3389/feart.2020.00063
DH	145.0	29.0	0.10829542137736034	0.09509638570505122	1.936106811482756e-05	1.94820828776351e-05	6x6x6 mm³	Previously unpublished snow sample. Obtained during a gradient box snow metamorphism experiment.
DH	156.0	26.0	0.11228767562526713	0.10739527950031665	1.9324465311950727e-05	1.9369321024998272e-05	6x6x6 mm³	Previously unpublished snow sample. Obtained during a gradient box snow metamorphism experiment.
DH	157.0	20.0	0.12255817243482045	0.12353195353062253	1.923030072552331e-05	1.9221372657499204e-05	6x6x6 mm³	Previously unpublished snow sample. Obtained during a gradient box snow metamorphism experiment.
DH	161.0	21.0	0.10856318279079977	0.11407154670367343	1.9358613156394168e-05	1.9308109970485482e-05	6x6x6 mm³	Previously unpublished snow sample. Obtained during a gradient box snow metamorphism experiment.
DH	177.0	18.0	0.12688371070943244	0.14103322079924221	1.91906422230908e-05	1.9060913078487186e-05	6x6x6 mm³	Previously unpublished snow sample. Obtained during a gradient box snow metamorphism experiment.
DH	178.0	18.0	0.133266225717739	0.1520303720027164	1.9132124422319472e-05	1.8960086194047506e-05	6x6x6 mm³	Previously unpublished snow sample. Obtained during a gradient box snow metamorphism experiment.
DH	187.0	20.0	0.1359812255249313	0.15068465340846715	1.9107232069131946e-05	1.897242435423829e-05	6x6x6 mm³	Previously unpublished snow sample. Obtained during a gradient box snow metamorphism experiment.
DH	193.0	19.0	0.14310929705651254	0.1678543106848649	1.904187866702855e-05	1.881500512647235e-05	6x6x6 mm³	Previously unpublished snow sample. Obtained during a gradient box snow metamorphism experiment.
DH	197.0	19.0	0.16196534813093544	0.19358530186603318	1.8868997813842785e-05	1.8579091695226407e-05	6x6x6 mm³	Previously unpublished snow sample. Obtained during a gradient box snow metamorphism experiment.
DH	200.0	19.0	0.16080995258644792	0.18883431762699301	1.8879591005742277e-05	1.8622650879780773e-05	6x6x6 mm³	Previously unpublished snow sample. Obtained during a gradient box snow metamorphism experiment.
FC	214.0	20.0	0.2000968998314101	0.144107180643601	1.8519390403189496e-05	1.903272961640098e-05	9x9x9 mm³	Snow sample provided by Hagenmuller et al., 2016, doi :10.5194/tc-10-1039-2016
DF	217.0	33.0	0.19650957531453722	0.15981821334437785	1.8552280626104326e-05	1.8888683722219882e-05	9x9x9 mm³	Snow sample provided by Hagenmuller et al., 2019, doi :10.5194/tc-13-2345-2019
FC	230.0	20.0	0.21237149422915585	0.1541530397802034	1.840685133848204e-05	1.8940624610338726e-05	9x9x9 mm³	Snow sample provided by Hagenmuller et al., 2016, doi :10.5194/tc-10-1039-2016
FC	236.0	24.0	0.19167808802160002	0.21966098702696532	1.859657789927475e-05	1.8340017952785174e-05	9x9x9 mm³	Snow sample provided by Hagenmuller et al., 2019, doi :10.5194/tc-13-2345-2019
FC	265.0	19.0	0.23764243487753584	0.23074376891986673	1.817515585978105e-05	1.8238405967234524e-05	9x9x9 mm³	Snow sample provided by Hagenmuller et al., 2016, doi :10.5194/tc-10-1039-2016
RG	266.0	19.0	0.2293615118504972	0.22849871953666373	1.8251079128785235e-05	1.8258989601171472e-05	9x9x9 mm³	Snow sample provided by Hagenmuller et al., 2016, doi :10.5194/tc-10-1039-2016
FC	270.0	19.0	0.23875773240804246	0.23930091438827858	1.8164930304712867e-05	1.815995016524423e-05	9x9x9 mm³	Snow sample provided by Hagenmuller et al., 2016, doi :10.5194/tc-10-1039-2016
RG	275.0	19.0	0.24329810763076942	0.24875933098980582	1.8123302079418482e-05	1.8073231099549905e-05	9x9x9 mm³	Snow sample provided by Hagenmuller et al., 2016, doi :10.5194/tc-10-1039-2016
FC	282.0	18.0	0.25475149620177906	0.27488633274709207	1.8018292203267366e-05	1.7833686863211233e-05	9x9x9 mm³	Snow sample provided by Hagenmuller et al., 2016, doi :10.5194/tc-10-1039-2016
FC	287.0	18.0	0.25881674763241824	0.28475833715375337	1.798102012901546e-05	1.7743175836393307e-05	9x9x9 mm³	Snow sample provided by Hagenmuller et al., 2016, doi :10.5194/tc-10-1039-2016
RG	293.0	23.0	0.24094860357752595	0.22358657441762045	1.814484340128301e-05	1.830402638197996e-05	9x9x9 mm³	Snow sample provided by Peinke et al., 2020, doi :10.3389/feart.2020.00063
RG	312.0	23.0	0.26168377616812083	0.2540643904666514	1.7954733907292585e-05	1.8024591901186554e-05	9x9x9 mm³	Snow sample provided by Peinke et al., 2020, doi :10.3389/feart.2020.00063
RG	316.0	34.0	0.26816683029698896	0.26458864889528966	1.7895294318132342e-05	1.7928100712808392e-05	6x6x6 mm³	Previously unpublished snow sample. Sampled at Col du Lautaret, France.
FC	318.0	16.0	0.2856060426092949	0.3212846200410435	1.773540368718636e-05	1.7408286260398e-05	9x9x9 mm³	Snow sample provided by Hagenmuller et al., 2016, doi :10.5194/tc-10-1039-2016
RG	324.0	21.0	0.2639897353891266	0.2630130975048562	1.793359182425698e-05	1.794254608461721e-05	9x9x9 mm³	Snow sample provided by Peinke et al., 2020, doi :10.3389/feart.2020.00063
FC	329.0	15.0	0.30529434175694614	0.333779709598323	1.75548924051057e-05	1.7293725595772674e-05	9x9x9 mm³	Snow sample provided by Hagenmuller et al., 2016, doi :10.5194/tc-10-1039-2016
DH	353.0	17.0	0.30186000999849616	0.28181635983702197	1.7586379920820438e-05	1.777014922263215e-05	9x9x9 mm³	Snow sample provided by Peinke et al., 2020, doi :10.3389/feart.2020.00063
DH	364.0	17.0	0.30662226528576847	0.28927277505936194	1.7542717398169084e-05	1.770178541622021e-05	9x9x9 mm³	Snow sample provided by Peinke et al., 2020, doi :10.3389/feart.2020.00063
DH	372.0	16.0	0.33384493301624296	0.30688137994929765	1.7293127597809413e-05	1.754034171707196e-05	9x9x9 mm³	Snow sample provided by Peinke et al., 2020, doi :10.3389/feart.2020.00063
MF	380.0	5.0	0.3892353600546097	0.5009912293746875	1.6785282967620326e-05	1.576065432399202e-05	9x9x9 mm³	Previously unpublished snow sample. Sampled at Col du Lautaret, France.
MF	445.0	5.0	0.49349489167078764	0.6420096660237009	1.5829384157874193e-05	1.4467733152608827e-05	9x9x9 mm³	Previously unpublished snow sample. Provided by Marie Dumont and colleagues (see acknowledgment section)

## Sheet: Temperature 263 K
Snow Type	Density(kg/m3)	SSA(m2/kg)	Kxy(W/K/m)	Kz(W/K/m)	Dxy(m2/s)	Dz(m2/s)	Sample Size	Comments
PP	93.0	53.0	0.07996145086061003	0.07673641782578126	1.959051427690703e-05	1.9618973267286636e-05	7.5x7.5x7.5 mm³	Snow sample provided by Peinke et al., 2020, doi :10.3389/feart.2020.00063
DF	125.0	40.0	0.10655096073380058	0.08773062073362382	1.9355877732875565e-05	1.952195599291868e-05	6x6x6 mm³	Previously unpublished snow sample. Obtained during a gradient box snow metamorphism experiment.
PP	137.0	41.0	0.11195780370734398	0.10836434599923368	1.9308165572873993e-05	1.9339875690953465e-05	7.5x7.5x7.5 mm³	Snow sample provided by Peinke et al., 2020, doi :10.3389/feart.2020.00063
DH	145.0	29.0	0.10003739703106199	0.08774601251453452	1.9413356042322715e-05	1.9521820169644892e-05	6x6x6 mm³	Previously unpublished snow sample. Obtained during a gradient box snow metamorphism experiment.
DH	156.0	26.0	0.10353120893846317	0.09979672316628659	1.938252523892099e-05	1.9415479845436764e-05	6x6x6 mm³	Previously unpublished snow sample. Obtained during a gradient box snow metamorphism experiment.
DH	157.0	20.0	0.11409679928827438	0.11585153405675822	1.928929021438857e-05	1.927380572807301e-05	6x6x6 mm³	Previously unpublished snow sample. Obtained during a gradient box snow metamorphism experiment.
DH	161.0	21.0	0.0997490716884773	0.10660027011646438	1.9415900341268556e-05	1.935544260702361e-05	6x6x6 mm³	Previously unpublished snow sample. Obtained during a gradient box snow metamorphism experiment.
DH	177.0	18.0	0.11766446451410201	0.13385618174267477	1.9257807699560665e-05	1.911492546553056e-05	6x6x6 mm³	Previously unpublished snow sample. Obtained during a gradient box snow metamorphism experiment.
DH	178.0	18.0	0.123564814646073	0.14484604439692464	1.9205740633633392e-05	1.9017946491308338e-05	6x6x6 mm³	Previously unpublished snow sample. Obtained during a gradient box snow metamorphism experiment.
DH	187.0	20.0	0.1266094178401158	0.1440837729051445	1.9178873828836904e-05	1.9024673081956225e-05	6x6x6 mm³	Previously unpublished snow sample. Obtained during a gradient box snow metamorphism experiment.
DH	193.0	19.0	0.13406725573687805	0.16153748491933392	1.911306286359577e-05	1.8870654497670132e-05	6x6x6 mm³	Previously unpublished snow sample. Obtained during a gradient box snow metamorphism experiment.
DH	197.0	19.0	0.15253822458652982	0.1882593804207222	1.8950067595293932e-05	1.863484972953721e-05	6x6x6 mm³	Previously unpublished snow sample. Obtained during a gradient box snow metamorphism experiment.
DH	200.0	19.0	0.1512962728290049	0.18272102787145542	1.8961027077797717e-05	1.8683722383000373e-05	6x6x6 mm³	Previously unpublished snow sample. Obtained during a gradient box snow metamorphism experiment.
FC	214.0	20.0	0.19324083720486768	0.13675482369884448	1.859089134859494e-05	1.9089346681482868e-05	9x9x9 mm³	Snow sample provided by Hagenmuller et al., 2016, doi :10.5194/tc-10-1039-2016
DF	217.0	33.0	0.18866042813444728	0.15145194846305274	1.8631310722989553e-05	1.8959653333304604e-05	9x9x9 mm³	Snow sample provided by Hagenmuller et al., 2019, doi :10.5194/tc-13-2345-2019
FC	230.0	20.0	0.20558693696094577	0.14660613814684298	1.848194439196244e-05	1.900241471518227e-05	9x9x9 mm³	Snow sample provided by Hagenmuller et al., 2016, doi :10.5194/tc-10-1039-2016
FC	236.0	24.0	0.18289235051076452	0.21448101288614066	1.868221056303101e-05	1.8403459483914346e-05	9x9x9 mm³	Snow sample provided by Hagenmuller et al., 2019, doi :10.5194/tc-13-2345-2019
FC	265.0	19.0	0.23151720938300122	0.2254525972320771	1.8253125224707305e-05	1.830664180484626e-05	9x9x9 mm³	Snow sample provided by Hagenmuller et al., 2016, doi :10.5194/tc-10-1039-2016
RG	266.0	19.0	0.22283338173383338	0.2232960328983359	1.832975481729036e-05	1.8325672197082286e-05	9x9x9 mm³	Snow sample provided by Hagenmuller et al., 2016, doi :10.5194/tc-10-1039-2016
FC	270.0	19.0	0.23255257423595593	0.23431112114892866	1.824398874825221e-05	1.822847062203834e-05	9x9x9 mm³	Snow sample provided by Hagenmuller et al., 2016, doi :10.5194/tc-10-1039-2016
RG	275.0	19.0	0.23691845140357348	0.24384035340033627	1.8205462489770533e-05	1.814438083875889e-05	9x9x9 mm³	Snow sample provided by Hagenmuller et al., 2016, doi :10.5194/tc-10-1039-2016
FC	282.0	18.0	0.24949997203092455	0.2710695578200272	1.8094438084554296e-05	1.7904099372412473e-05	9x9x9 mm³	Snow sample provided by Hagenmuller et al., 2016, doi :10.5194/tc-10-1039-2016
FC	287.0	18.0	0.25354534800466694	0.2810049090055483	1.805874005768905e-05	1.7816425832094223e-05	9x9x9 mm³	Snow sample provided by Hagenmuller et al., 2016, doi :10.5194/tc-10-1039-2016
RG	293.0	23.0	0.23240547784934334	0.21507313021225652	1.824528678601067e-05	1.8398234402153773e-05	9x9x9 mm³	Snow sample provided by Peinke et al., 2020, doi :10.3389/feart.2020.00063
RG	312.0	23.0	0.25321669271787645	0.24586447829893637	1.8061640244305426e-05	1.8126519145438453e-05	9x9x9 mm³	Snow sample provided by Peinke et al., 2020, doi :10.3389/feart.2020.00063
RG	316.0	34.0	0.2593527374283927	0.2568703596891065	1.8007493314491205e-05	1.8029398815438932e-05	6x6x6 mm³	Previously unpublished snow sample. Sampled at Col du Lautaret, France.
FC	318.0	16.0	0.28103498982228764	0.31832328756507444	1.7816160386852284e-05	1.748711342972859e-05	9x9x9 mm³	Snow sample provided by Hagenmuller et al., 2016, doi :10.5194/tc-10-1039-2016
RG	324.0	21.0	0.25502168144670767	0.2547500867169945	1.8045712296804002e-05	1.8048108958083618e-05	9x9x9 mm³	Snow sample provided by Peinke et al., 2020, doi :10.3389/feart.2020.00063
FC	329.0	15.0	0.30120642622781135	0.3306946765483703	1.763815950797506e-05	1.73779433107699e-05	9x9x9 mm³	Snow sample provided by Hagenmuller et al., 2016, doi :10.5194/tc-10-1039-2016
DH	353.0	17.0	0.29200397632023645	0.272073765005514	1.7719365632241126e-05	1.789523784376385e-05	9x9x9 mm³	Snow sample provided by Peinke et al., 2020, doi :10.3389/feart.2020.00063
DH	364.0	17.0	0.29606738423655676	0.27909641519007494	1.7683508484252215e-05	1.7833267150166796e-05	9x9x9 mm³	Snow sample provided by Peinke et al., 2020, doi :10.3389/feart.2020.00063
DH	372.0	16.0	0.32515319093562123	0.29796375300774325	1.742684361164707e-05	1.7666774162453788e-05	9x9x9 mm³	Snow sample provided by Peinke et al., 2020, doi :10.3389/feart.2020.00063
MF	380.0	5.0	0.3896663965107244	0.5080352832171385	1.68575531029944e-05	1.5813018373693174e-05	9x9x9 mm³	Previously unpublished snow sample. Sampled at Col du Lautaret, France.
MF	445.0	5.0	0.4953779179265244	0.6530837432126423	1.5924712062764443e-05	1.45330523445056e-05	9x9x9 mm³	Previously unpublished snow sample. Provided by Marie Dumont and colleagues (see acknowledgment section)

## Sheet: Temperature 248 K
Snow Type	Density(kg/m3)	SSA(m2/kg)	Kxy(W/K/m)	Kz(W/K/m)	Dxy(m2/s)	Dz(m2/s)	Sample Size	Comments
PP	93.0	53.0	0.06904162860080282	0.06595628099152653	1.9638439954031987e-05	1.9663888283784376e-05	7.5x7.5x7.5 mm³	Snow sample provided by Peinke et al., 2020, doi :10.3389/feart.2020.00063
DF	125.0	40.0	0.09428581361708879	0.07611914968956744	1.9430222785018873e-05	1.9580063682277424e-05	6x6x6 mm³	Previously unpublished snow sample. Obtained during a gradient box snow metamorphism experiment.
PP	137.0	41.0	0.10001132466113297	0.09673310346255728	1.9382998059800965e-05	1.9410037234839725e-05	7.5x7.5x7.5 mm³	Snow sample provided by Peinke et al., 2020, doi :10.3389/feart.2020.00063
DH	145.0	29.0	0.08651134732563526	0.07599744575440058	1.9494347547246292e-05	1.9581067511429438e-05	6x6x6 mm³	Previously unpublished snow sample. Obtained during a gradient box snow metamorphism experiment.
DH	156.0	26.0	0.08912776903258288	0.08751887470734027	1.947276697649649e-05	1.9486037336439868e-05	6x6x6 mm³	Previously unpublished snow sample. Obtained during a gradient box snow metamorphism experiment.
DH	157.0	20.0	0.1001807413094661	0.10336016399222929	1.9381600690273018e-05	1.935537641764651e-05	6x6x6 mm³	Previously unpublished snow sample. Obtained during a gradient box snow metamorphism experiment.
DH	161.0	21.0	0.08529440672728342	0.09456356095347175	1.9504385024236833e-05	1.9427931890539797e-05	6x6x6 mm³	Previously unpublished snow sample. Obtained during a gradient box snow metamorphism experiment.
DH	177.0	18.0	0.10241412943145811	0.12240417120097781	1.9363179428039017e-05	1.919829908418882e-05	6x6x6 mm³	Previously unpublished snow sample. Obtained during a gradient box snow metamorphism experiment.
DH	178.0	18.0	0.10741818618409277	0.1334445642418705	1.9321905347297555e-05	1.910723655306398e-05	6x6x6 mm³	Previously unpublished snow sample. Obtained during a gradient box snow metamorphism experiment.
DH	187.0	20.0	0.11106145568322137	0.13377822339344483	1.929185520859944e-05	1.9104484490998544e-05	6x6x6 mm³	Previously unpublished snow sample. Obtained during a gradient box snow metamorphism experiment.
DH	193.0	19.0	0.11911932769150536	0.15175442957278618	1.922539288086921e-05	1.8956214512869178e-05	6x6x6 mm³	Previously unpublished snow sample. Obtained during a gradient box snow metamorphism experiment.
DH	197.0	19.0	0.1368216102866563	0.18037238237794712	1.907938225843658e-05	1.8720170088690017e-05	6x6x6 mm³	Previously unpublished snow sample. Obtained during a gradient box snow metamorphism experiment.
DH	200.0	19.0	0.13542264281037134	0.17319320755591328	1.9090921115692837e-05	1.877938481304455e-05	6x6x6 mm³	Previously unpublished snow sample. Obtained during a gradient box snow metamorphism experiment.
FC	214.0	20.0	0.18231018161560253	0.12523815244202727	1.8704186880235475e-05	1.9174924055418158e-05	9x9x9 mm³	Snow sample provided by Hagenmuller et al., 2016, doi :10.5194/tc-10-1039-2016
DF	217.0	33.0	0.17582108188831547	0.13788111105000556	1.8757709779619543e-05	1.9070643364732168e-05	9x9x9 mm³	Snow sample provided by Hagenmuller et al., 2019, doi :10.5194/tc-13-2345-2019
FC	230.0	20.0	0.19486249430353597	0.13479926078480609	1.8600653848340696e-05	1.9096062847956844e-05	9x9x9 mm³	Snow sample provided by Hagenmuller et al., 2016, doi :10.5194/tc-10-1039-2016
FC	236.0	24.0	0.16849656297082705	0.20659640031421975	1.8818123320100193e-05	1.8503871136225637e-05	9x9x9 mm³	Snow sample provided by Hagenmuller et al., 2019, doi :10.5194/tc-13-2345-2019
FC	265.0	19.0	0.22236441354692393	0.21791823018394205	1.837381460739902e-05	1.841048727923042e-05	9x9x9 mm³	Snow sample provided by Hagenmuller et al., 2016, doi :10.5194/tc-10-1039-2016
RG	266.0	19.0	0.21288005222918238	0.21587809016592296	1.845204279587901e-05	1.842731460713458e-05	9x9x9 mm³	Snow sample provided by Hagenmuller et al., 2016, doi :10.5194/tc-10-1039-2016
FC	270.0	19.0	0.2232398890640308	0.22733967150485793	1.8366593576749998e-05	1.8332778062688124e-05	9x9x9 mm³	Snow sample provided by Hagenmuller et al., 2016, doi :10.5194/tc-10-1039-2016
RG	275.0	19.0	0.22731630419829457	0.2370124497602152	1.8332970799130873e-05	1.8252995787937616e-05	9x9x9 mm³	Snow sample provided by Hagenmuller et al., 2016, doi :10.5194/tc-10-1039-2016
FC	282.0	18.0	0.24209321161580188	0.2663227729400079	1.821108903399339e-05	1.8011240607034826e-05	9x9x9 mm³	Snow sample provided by Hagenmuller et al., 2016, doi :10.5194/tc-10-1039-2016
FC	287.0	18.0	0.2461068077011492	0.27636621260786376	1.817798439568108e-05	1.792840107098144e-05	9x9x9 mm³	Snow sample provided by Hagenmuller et al., 2016, doi :10.5194/tc-10-1039-2016
RG	293.0	23.0	0.21869646797142323	0.2015622481600137	1.8404068277435597e-05	1.8545393447571943e-05	9x9x9 mm³	Snow sample provided by Peinke et al., 2020, doi :10.3389/feart.2020.00063
RG	312.0	23.0	0.23979185170542686	0.23302255245523626	1.8230070935968416e-05	1.8285904955770122e-05	9x9x9 mm³	Snow sample provided by Peinke et al., 2020, doi :10.3389/feart.2020.00063
RG	316.0	34.0	0.24521475341684118	0.2448023682376891	1.818534217005822e-05	1.818874357416339e-05	6x6x6 mm³	Previously unpublished snow sample. Sampled at Col du Lautaret, France.
FC	318.0	16.0	0.27504818077574295	0.3153346413239062	1.7939272361006306e-05	1.7606984637735174e-05	9x9x9 mm³	Snow sample provided by Hagenmuller et al., 2016, doi :10.5194/tc-10-1039-2016
RG	324.0	21.0	0.24071017219132954	0.24183395087899423	1.8222496514702765e-05	1.82132274487063e-05	9x9x9 mm³	Snow sample provided by Peinke et al., 2020, doi :10.3389/feart.2020.00063
FC	329.0	15.0	0.2961583122399285	0.32756387363098205	1.776515337843144e-05	1.7506116412892883e-05	9x9x9 mm³	Snow sample provided by Hagenmuller et al., 2016, doi :10.5194/tc-10-1039-2016
DH	353.0	17.0	0.2760384655679123	0.2565366348549693	1.7931104369216938e-05	1.80919578877204e-05	9x9x9 mm³	Snow sample provided by Peinke et al., 2020, doi :10.3389/feart.2020.00063
DH	364.0	17.0	0.27880104620485846	0.2627282476700111	1.7908318261484636e-05	1.804088869728539e-05	9x9x9 mm³	Snow sample provided by Peinke et al., 2020, doi :10.3389/feart.2020.00063
DH	372.0	16.0	0.31151689379785624	0.2840884918634251	1.763847389283959e-05	1.7864706753898742e-05	9x9x9 mm³	Snow sample provided by Peinke et al., 2020, doi :10.3389/feart.2020.00063
MF	380.0	5.0	0.39316036686529854	0.5236307116394555	1.696506840086059e-05	1.588893281512021e-05	9x9x9 mm³	Previously unpublished snow sample. Sampled at Col du Lautaret, France.
MF	445.0	5.0	0.5019829779449717	0.676449311044089	1.606748600756858e-05	1.4628466053366824e-05	9x9x9 mm³	Previously unpublished snow sample. Provided by Marie Dumont and colleagues (see acknowledgment section)

## Sheet: Temperature 223 K
Snow Type	Density(kg/m3)	SSA(m2/kg)	Kxy(W/K/m)	Kz(W/K/m)	Dxy(m2/s)	Dz(m2/s)	Sample Size	Comments
PP	93.0	53.0	0.06313655265616525	0.06007288602610969	1.9693048470542202e-05	1.971509302504923e-05	7.5x7.5x7.5 mm³	Snow sample provided by Peinke et al., 2020, doi :10.3389/feart.2020.00063
DF	125.0	40.0	0.08861424700821077	0.07015586122830775	1.9509724209231527e-05	1.9642541170269305e-05	6x6x6 mm³	Previously unpublished snow sample. Obtained during a gradient box snow metamorphism experiment.
PP	137.0	41.0	0.0951980972216557	0.09214282943447756	1.946235024123104e-05	1.9484334362025153e-05	7.5x7.5x7.5 mm³	Snow sample provided by Peinke et al., 2020, doi :10.3389/feart.2020.00063
DH	145.0	29.0	0.07906485769472044	0.06995738259382457	1.9578436656977925e-05	1.964396931947896e-05	6x6x6 mm³	Previously unpublished snow sample. Obtained during a gradient box snow metamorphism experiment.
DH	156.0	26.0	0.08092154141592915	0.0815723690394934	1.956507692485402e-05	1.9560393907164823e-05	6x6x6 mm³	Previously unpublished snow sample. Obtained during a gradient box snow metamorphism experiment.
DH	157.0	20.0	0.09326165452981322	0.09823779902500201	1.9476283877499193e-05	1.9440478125175204e-05	6x6x6 mm³	Previously unpublished snow sample. Obtained during a gradient box snow metamorphism experiment.
DH	161.0	21.0	0.07686565807567397	0.08940514892496573	1.95942609556788e-05	1.950403328965086e-05	6x6x6 mm³	Previously unpublished snow sample. Obtained during a gradient box snow metamorphism experiment.
DH	177.0	18.0	0.09419412792715134	0.11995636102366466	1.9469574283043872e-05	1.92842026286519e-05	6x6x6 mm³	Previously unpublished snow sample. Obtained during a gradient box snow metamorphism experiment.
DH	178.0	18.0	0.09855554873388116	0.1319555031427049	1.9438191763236125e-05	1.9197863031554166e-05	6x6x6 mm³	Previously unpublished snow sample. Obtained during a gradient box snow metamorphism experiment.
DH	187.0	20.0	0.10311033026541219	0.13360056428091696	1.940541792003974e-05	1.918602602566947e-05	6x6x6 mm³	Previously unpublished snow sample. Obtained during a gradient box snow metamorphism experiment.
DH	193.0	19.0	0.11242188179436699	0.1534808186951296	1.933841682951269e-05	1.9042978036130292e-05	6x6x6 mm³	Previously unpublished snow sample. Obtained during a gradient box snow metamorphism experiment.
DH	197.0	19.0	0.13039804948114098	0.18634825346452125	1.9209069659520043e-05	1.8806481039305627e-05	6x6x6 mm³	Previously unpublished snow sample. Obtained during a gradient box snow metamorphism experiment.
DH	200.0	19.0	0.1287641240670718	0.17650611728303645	1.9220826538515137e-05	1.8877299941528814e-05	6x6x6 mm³	Previously unpublished snow sample. Obtained during a gradient box snow metamorphism experiment.
FC	214.0	20.0	0.18460399618842682	0.12326402476919388	1.881903180909889e-05	1.9260402397577826e-05	9x9x9 mm³	Snow sample provided by Hagenmuller et al., 2016, doi :10.5194/tc-10-1039-2016
DF	217.0	33.0	0.1754252048460141	0.13426818437995572	1.8885077626248653e-05	1.9181222178044905e-05	9x9x9 mm³	Snow sample provided by Hagenmuller et al., 2019, doi :10.5194/tc-13-2345-2019
FC	230.0	20.0	0.19839467922246634	0.1333004973170404	1.8719801213690562e-05	1.9188185151755855e-05	9x9x9 mm³	Snow sample provided by Hagenmuller et al., 2016, doi :10.5194/tc-10-1039-2016
FC	236.0	24.0	0.16600854597555903	0.21399207038345713	1.895283501463659e-05	1.860757048458879e-05	9x9x9 mm³	Snow sample provided by Hagenmuller et al., 2019, doi :10.5194/tc-13-2345-2019
FC	265.0	19.0	0.23018870430986418	0.2273897296453252	1.849102791565576e-05	1.8511167884198974e-05	9x9x9 mm³	Snow sample provided by Hagenmuller et al., 2016, doi :10.5194/tc-10-1039-2016
RG	266.0	19.0	0.21902790901215277	0.2252482367713707	1.8571335204271467e-05	1.8526576955121762e-05	9x9x9 mm³	Snow sample provided by Hagenmuller et al., 2016, doi :10.5194/tc-10-1039-2016
FC	270.0	19.0	0.2309252033115784	0.23812120958986913	1.8485728451207378e-05	1.843394972597714e-05	9x9x9 mm³	Snow sample provided by Hagenmuller et al., 2016, doi :10.5194/tc-10-1039-2016
RG	275.0	19.0	0.23500603100637524	0.24866647407543677	1.8456364933757666e-05	1.8358071477520676e-05	9x9x9 mm³	Snow sample provided by Hagenmuller et al., 2016, doi :10.5194/tc-10-1039-2016
FC	282.0	18.0	0.253500050918143	0.2825340889191028	1.832329156800715e-05	1.811437770414471e-05	9x9x9 mm³	Snow sample provided by Hagenmuller et al., 2016, doi :10.5194/tc-10-1039-2016
FC	287.0	18.0	0.2577729673269237	0.2933707165713436	1.829254587989824e-05	1.803640295760779e-05	9x9x9 mm³	Snow sample provided by Hagenmuller et al., 2016, doi :10.5194/tc-10-1039-2016
RG	293.0	23.0	0.22088032828418763	0.20297124286184548	1.8558006156909842e-05	1.868687063775471e-05	9x9x9 mm³	Snow sample provided by Peinke et al., 2020, doi :10.3389/feart.2020.00063
RG	312.0	23.0	0.244024501863136	0.23756113286001626	1.839147269958912e-05	1.84379797473503e-05	9x9x9 mm³	Snow sample provided by Peinke et al., 2020, doi :10.3389/feart.2020.00063
RG	316.0	34.0	0.24894243990300857	0.2509236993396245	1.835608577069856e-05	1.8341829656402515e-05	6x6x6 mm³	Previously unpublished snow sample. Sampled at Col du Lautaret, France.
FC	318.0	16.0	0.2906226030634371	0.33723322399518735	1.805617695567345e-05	1.772079112627014e-05	9x9x9 mm³	Snow sample provided by Hagenmuller et al., 2016, doi :10.5194/tc-10-1039-2016
RG	324.0	21.0	0.2440380323260351	0.2469392155542592	1.8391375341402707e-05	1.83704999330988e-05	9x9x9 mm³	Snow sample provided by Peinke et al., 2020, doi :10.3389/feart.2020.00063
FC	329.0	15.0	0.31439514035440025	0.3503235094714859	1.7885122119308466e-05	1.762660022806213e-05	9x9x9 mm³	Snow sample provided by Hagenmuller et al., 2016, doi :10.5194/tc-10-1039-2016
DH	353.0	17.0	0.2800012631179458	0.2598912957636884	1.8132602603643453e-05	1.82773034882392e-05	9x9x9 mm³	Snow sample provided by Peinke et al., 2020, doi :10.3389/feart.2020.00063
DH	364.0	17.0	0.2814756275612257	0.2655241208810245	1.8121993842554943e-05	1.823677260308691e-05	9x9x9 mm³	Snow sample provided by Peinke et al., 2020, doi :10.3389/feart.2020.00063
DH	372.0	16.0	0.32095575794198505	0.2915126517901649	1.7837915321221997e-05	1.8049772627122236e-05	9x9x9 mm³	Snow sample provided by Peinke et al., 2020, doi :10.3389/feart.2020.00063
MF	380.0	5.0	0.42832412202803605	0.5816986205055058	1.7065348315658936e-05	1.5961745052005695e-05	9x9x9 mm³	Previously unpublished snow sample. Sampled at Col du Lautaret, France.
MF	445.0	5.0	0.5490490872783509	0.754770552902984	1.61966741424603e-05	1.471640928017471e-05	9x9x9 mm³	Previously unpublished snow sample. Provided by Marie Dumont and colleagues (see acknowledgment section)
