# Supplementary material for: Impact of water vapor diffusion and latent heat on the effective thermal conductivity of snow
Source: Copernicus journal article supplement (doi:10.5194/tc-15-2739-2021), 2021-06-18
Supplement: Supplementary file 1 [file tc-15-2739-2021-supplement.zip]

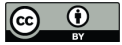

## *Supplement of*

# **Impact of water vapor diffusion and latent heat on the effective thermal conductivity of snow**

**Kévin Fourteau et al.**

*Correspondence to:* Kévin Fourteau (kfourteau@protonmail.com)

- tc-15-2739-2021-supplement-title-page.pdf
- Supplement
  - Table\_Keff\_DeFF\_FastKins.xls
  - Table\_Keff\_SlowKins.xls
  - Thermal\_Conductivity\_Polynomail\_Fits.txt

The copyright of individual parts of the supplement might differ from the article licence.
