# Supplementary material for: Impact of water vapor diffusion and latent heat on the effective thermal conductivity of snow
Source: Copernicus journal article supplement (doi:10.5194/tc-15-2739-2021), 2021-06-18
Supplement: Supplementary file 2 [file Table_Keff_SlowKins.xls]

## Sheet: Notes
Data set of snow effective thermal conductivity under slow surface kinetics
Published as a Supplementary Materiel of Fourteau et al. 2020, The Cryosphere Discussion
Please cite if using

## Sheet: Temperature 273 K
Snow Type	Density(kg/m3)	SSA(m2/kg)	Kz(W/K/m)	Sample Size	Comments
PP	93.0	53.0	0.0602987	7.5x7.5x7.5 mm³	Snow sample provided by Peinke et al., 2020, doi :10.3389/feart.2020.00063
DF	125.0	40.0	0.0694437	6x6x6 mm³	Previously unpublished snow sample. Obtained during a gradient box snow metamorphism experiment.
PP	137.0	41.0	0.0876979	7.5x7.5x7.5 mm³	Snow sample provided by Peinke et al., 2020, doi :10.3389/feart.2020.00063
DH	145.0	29.0	0.0693514	6x6x6 mm³	Previously unpublished snow sample. Obtained during a gradient box snow metamorphism experiment.
DH	156.0	26.0	0.079659	6x6x6 mm³	Previously unpublished snow sample. Obtained during a gradient box snow metamorphism experiment.
DH	157.0	20.0	0.0937274	6x6x6 mm³	Previously unpublished snow sample. Obtained during a gradient box snow metamorphism experiment.
DH	161.0	21.0	0.0858501	6x6x6 mm³	Previously unpublished snow sample. Obtained during a gradient box snow metamorphism experiment.
DH	177.0	18.0	0.110382	6x6x6 mm³	Previously unpublished snow sample. Obtained during a gradient box snow metamorphism experiment.
DH	178.0	18.0	0.120136	6x6x6 mm³	Previously unpublished snow sample. Obtained during a gradient box snow metamorphism experiment.
DH	187.0	20.0	0.120219	6x6x6 mm³	Previously unpublished snow sample. Obtained during a gradient box snow metamorphism experiment.
DH	193.0	19.0	0.136033	6x6x6 mm³	Previously unpublished snow sample. Obtained during a gradient box snow metamorphism experiment.
DH	197.0	19.0	0.161001	6x6x6 mm³	Previously unpublished snow sample. Obtained during a gradient box snow metamorphism experiment.
DH	200.0	19.0	0.154979	6x6x6 mm³	Previously unpublished snow sample. Obtained during a gradient box snow metamorphism experiment.
FC	214.0	20.0	0.112889	9x9x9 mm³	Snow sample provided by Hagenmuller et al., 2016, doi :10.5194/tc-10-1039-2016
DF	217.0	33.0	0.124473	9x9x9 mm³	Snow sample provided by Hagenmuller et al., 2019, doi :10.5194/tc-13-2345-2019
FC	230.0	20.0	0.121407	9x9x9 mm³	Snow sample provided by Hagenmuller et al., 2016, doi :10.5194/tc-10-1039-2016
FC	236.0	24.0	0.184244	9x9x9 mm³	Snow sample provided by Hagenmuller et al., 2019, doi :10.5194/tc-13-2345-2019
FC	265.0	19.0	0.194148	9x9x9 mm³	Snow sample provided by Hagenmuller et al., 2016, doi :10.5194/tc-10-1039-2016
RG	266.0	19.0	0.192323	9x9x9 mm³	Snow sample provided by Hagenmuller et al., 2016, doi :10.5194/tc-10-1039-2016
FC	270.0	19.0	0.20238	9x9x9 mm³	Snow sample provided by Hagenmuller et al., 2016, doi :10.5194/tc-10-1039-2016
RG	275.0	19.0	0.210911	9x9x9 mm³	Snow sample provided by Hagenmuller et al., 2016, doi :10.5194/tc-10-1039-2016
FC	282.0	18.0	0.236461	9x9x9 mm³	Snow sample provided by Hagenmuller et al., 2016, doi :10.5194/tc-10-1039-2016
FC	287.0	18.0	0.245331	9x9x9 mm³	Snow sample provided by Hagenmuller et al., 2016, doi :10.5194/tc-10-1039-2016
RG	293.0	23.0	0.180805	9x9x9 mm³	Snow sample provided by Peinke et al., 2020, doi :10.3389/feart.2020.00063
RG	312.0	23.0	0.20852	9x9x9 mm³	Snow sample provided by Peinke et al., 2020, doi :10.3389/feart.2020.00063
RG	316.0	34.0	0.218802	6x6x6 mm³	Previously unpublished snow sample. Sampled at Col du Lautaret, France.
FC	318.0	16.0	0.279504	9x9x9 mm³	Snow sample provided by Hagenmuller et al., 2016, doi :10.5194/tc-10-1039-2016
RG	324.0	21.0	0.216333	9x9x9 mm³	Snow sample provided by Peinke et al., 2020, doi :10.3389/feart.2020.00063
FC	329.0	15.0	0.290339	9x9x9 mm³	Snow sample provided by Hagenmuller et al., 2016, doi :10.5194/tc-10-1039-2016
DH	353.0	17.0	0.229844	9x9x9 mm³	Snow sample provided by Peinke et al., 2020, doi :10.3389/feart.2020.00063
DH	364.0	17.0	0.235473	9x9x9 mm³	Snow sample provided by Peinke et al., 2020, doi :10.3389/feart.2020.00063
DH	372.0	16.0	0.253894	9x9x9 mm³	Snow sample provided by Peinke et al., 2020, doi :10.3389/feart.2020.00063
MF	380.0	5.0	0.459567	9x9x9 mm³	Previously unpublished snow sample. Sampled at Col du Lautaret, France.
MF	445.0	5.0	0.594114	9x9x9 mm³	Previously unpublished snow sample. Provided by Marie Dumont and colleagues (see acknowledgment section)

## Sheet: Temperature 248 K
Snow Type	Density(kg/m3)	SSA(m2/kg)	Kz(W/K/m)	Sample Size	Comments
PP	93.0	53.0	0.0600704	7.5x7.5x7.5 mm³	Snow sample provided by Peinke et al., 2020, doi :10.3389/feart.2020.00063
DF	125.0	40.0	0.0696502	6x6x6 mm³	Previously unpublished snow sample. Obtained during a gradient box snow metamorphism experiment.
PP	137.0	41.0	0.0896811	7.5x7.5x7.5 mm³	Snow sample provided by Peinke et al., 2020, doi :10.3389/feart.2020.00063
DH	145.0	29.0	0.0694956	6x6x6 mm³	Previously unpublished snow sample. Obtained during a gradient box snow metamorphism experiment.
DH	156.0	26.0	0.0804524	6x6x6 mm³	Previously unpublished snow sample. Obtained during a gradient box snow metamorphism experiment.
DH	157.0	20.0	0.0957584	6x6x6 mm³	Previously unpublished snow sample. Obtained during a gradient box snow metamorphism experiment.
DH	161.0	21.0	0.0874148	6x6x6 mm³	Previously unpublished snow sample. Obtained during a gradient box snow metamorphism experiment.
DH	177.0	18.0	0.114782	6x6x6 mm³	Previously unpublished snow sample. Obtained during a gradient box snow metamorphism experiment.
DH	178.0	18.0	0.125575	6x6x6 mm³	Previously unpublished snow sample. Obtained during a gradient box snow metamorphism experiment.
DH	187.0	20.0	0.126377	6x6x6 mm³	Previously unpublished snow sample. Obtained during a gradient box snow metamorphism experiment.
DH	193.0	19.0	0.144102	6x6x6 mm³	Previously unpublished snow sample. Obtained during a gradient box snow metamorphism experiment.
DH	197.0	19.0	0.172786	6x6x6 mm³	Previously unpublished snow sample. Obtained during a gradient box snow metamorphism experiment.
DH	200.0	19.0	0.165021	6x6x6 mm³	Previously unpublished snow sample. Obtained during a gradient box snow metamorphism experiment.
FC	214.0	20.0	0.117597	9x9x9 mm³	Snow sample provided by Hagenmuller et al., 2016, doi :10.5194/tc-10-1039-2016
DF	217.0	33.0	0.128973	9x9x9 mm³	Snow sample provided by Hagenmuller et al., 2019, doi :10.5194/tc-13-2345-2019
FC	230.0	20.0	0.126821	9x9x9 mm³	Snow sample provided by Hagenmuller et al., 2016, doi :10.5194/tc-10-1039-2016
FC	236.0	24.0	0.198175	9x9x9 mm³	Snow sample provided by Hagenmuller et al., 2019, doi :10.5194/tc-13-2345-2019
FC	265.0	19.0	0.209593	9x9x9 mm³	Snow sample provided by Hagenmuller et al., 2016, doi :10.5194/tc-10-1039-2016
RG	266.0	19.0	0.207628	9x9x9 mm³	Snow sample provided by Hagenmuller et al., 2016, doi :10.5194/tc-10-1039-2016
FC	270.0	19.0	0.218996	9x9x9 mm³	Snow sample provided by Hagenmuller et al., 2016, doi :10.5194/tc-10-1039-2016
RG	275.0	19.0	0.228479	9x9x9 mm³	Snow sample provided by Hagenmuller et al., 2016, doi :10.5194/tc-10-1039-2016
FC	282.0	18.0	0.257924	9x9x9 mm³	Snow sample provided by Hagenmuller et al., 2016, doi :10.5194/tc-10-1039-2016
FC	287.0	18.0	0.26773	9x9x9 mm³	Snow sample provided by Hagenmuller et al., 2016, doi :10.5194/tc-10-1039-2016
RG	293.0	23.0	0.191094	9x9x9 mm³	Snow sample provided by Peinke et al., 2020, doi :10.3389/feart.2020.00063
RG	312.0	23.0	0.22203	9x9x9 mm³	Snow sample provided by Peinke et al., 2020, doi :10.3389/feart.2020.00063
RG	316.0	34.0	0.233803	6x6x6 mm³	Previously unpublished snow sample. Sampled at Col du Lautaret, France.
FC	318.0	16.0	0.30643	9x9x9 mm³	Snow sample provided by Hagenmuller et al., 2016, doi :10.5194/tc-10-1039-2016
RG	324.0	21.0	0.230583	9x9x9 mm³	Snow sample provided by Peinke et al., 2020, doi :10.3389/feart.2020.00063
FC	329.0	15.0	0.318309	9x9x9 mm³	Snow sample provided by Hagenmuller et al., 2016, doi :10.5194/tc-10-1039-2016
DH	353.0	17.0	0.24382	9x9x9 mm³	Snow sample provided by Peinke et al., 2020, doi :10.3389/feart.2020.00063
DH	364.0	17.0	0.249478	9x9x9 mm³	Snow sample provided by Peinke et al., 2020, doi :10.3389/feart.2020.00063
DH	372.0	16.0	0.271402	9x9x9 mm³	Snow sample provided by Peinke et al., 2020, doi :10.3389/feart.2020.00063
MF	380.0	5.0	0.517152	9x9x9 mm³	Previously unpublished snow sample. Sampled at Col du Lautaret, France.
MF	445.0	5.0	0.669355	9x9x9 mm³	Previously unpublished snow sample. Provided by Marie Dumont and colleagues (see acknowledgment section)
